# Supplementary material for: New manganese-scaffolded organic triple-deckers based on quinoxaline, pyrazine and pyrimidine cores
Source: Royal Society of Chemistry journal article supplement (doi:10.1039/b513322j), 2005-12-14
Supplement: b513322j.pdf [file b513322j.pdf]

**New manganese-scaffolded organic triple-deckers based on  
quinoxaline, pyrazine and pyrimidine cores.**

**Jean-Pierre Djukic,\* Christophe Michon, Zoran Ratkovic, Nathalie Kyritsakas-Gruber,  
André de Cian and Michel Pfeffer.**

*Institut de Chimie de Strasbourg, UMR 7177, Université Louis Pasteur, 4, rue Blaise Pascal,  
F-67000 Strasbourg, France. E-mail : [djukic@chimie.u-strasbg.fr](mailto:djukic@chimie.u-strasbg.fr); Fax : 33 (0) 390 24 50  
01 ; Tel : 33 (0) 390 24 15 23*

**Electronic Supporting Information**

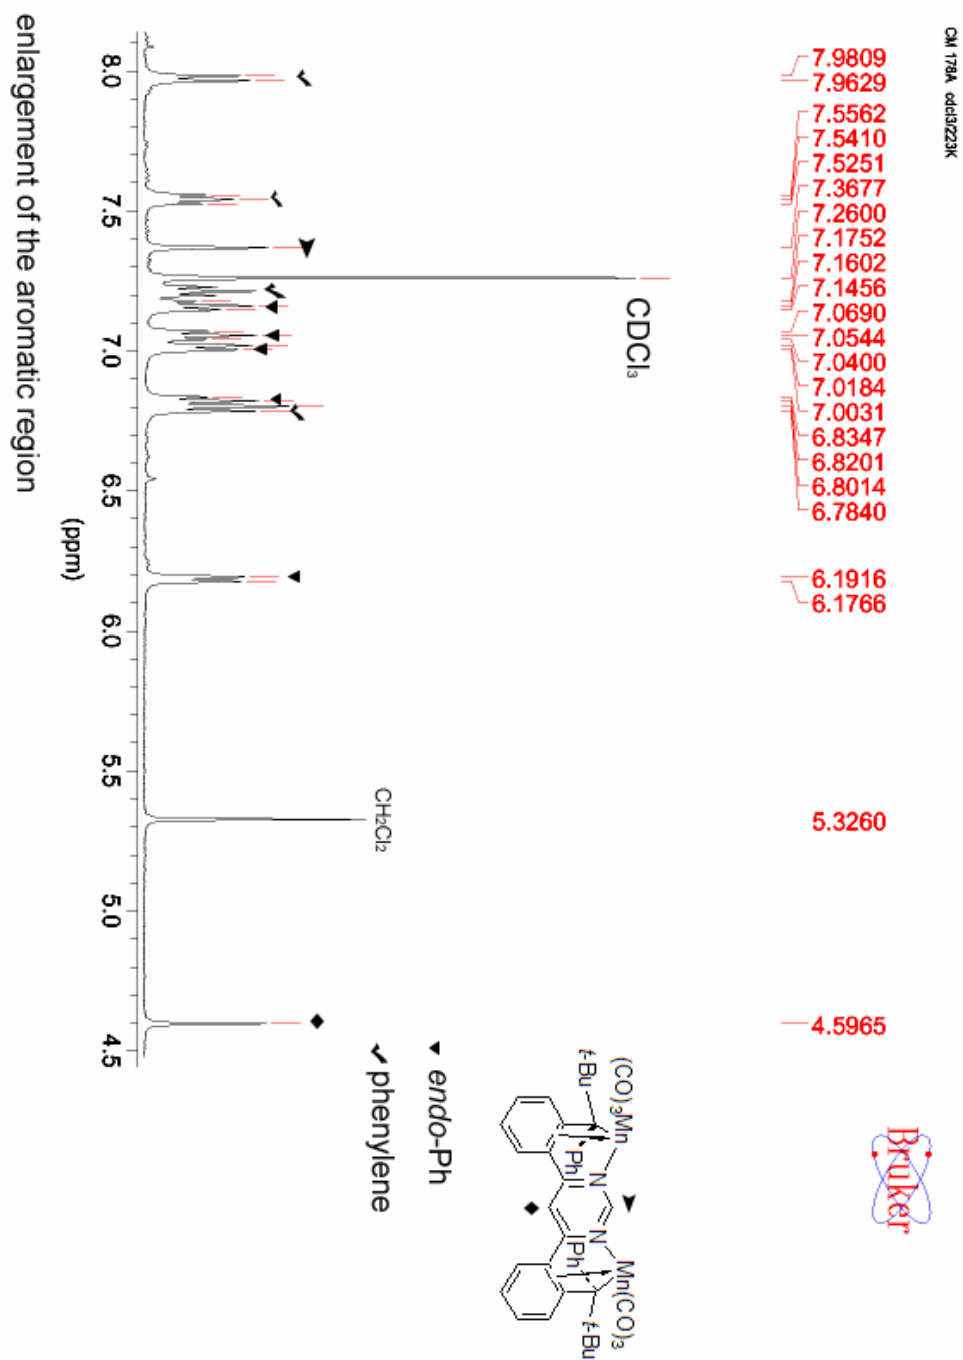

<sup>1</sup>H NMR (500 MHz) spectrum of **3d** measured at 223 K in CDCl<sub>3</sub>

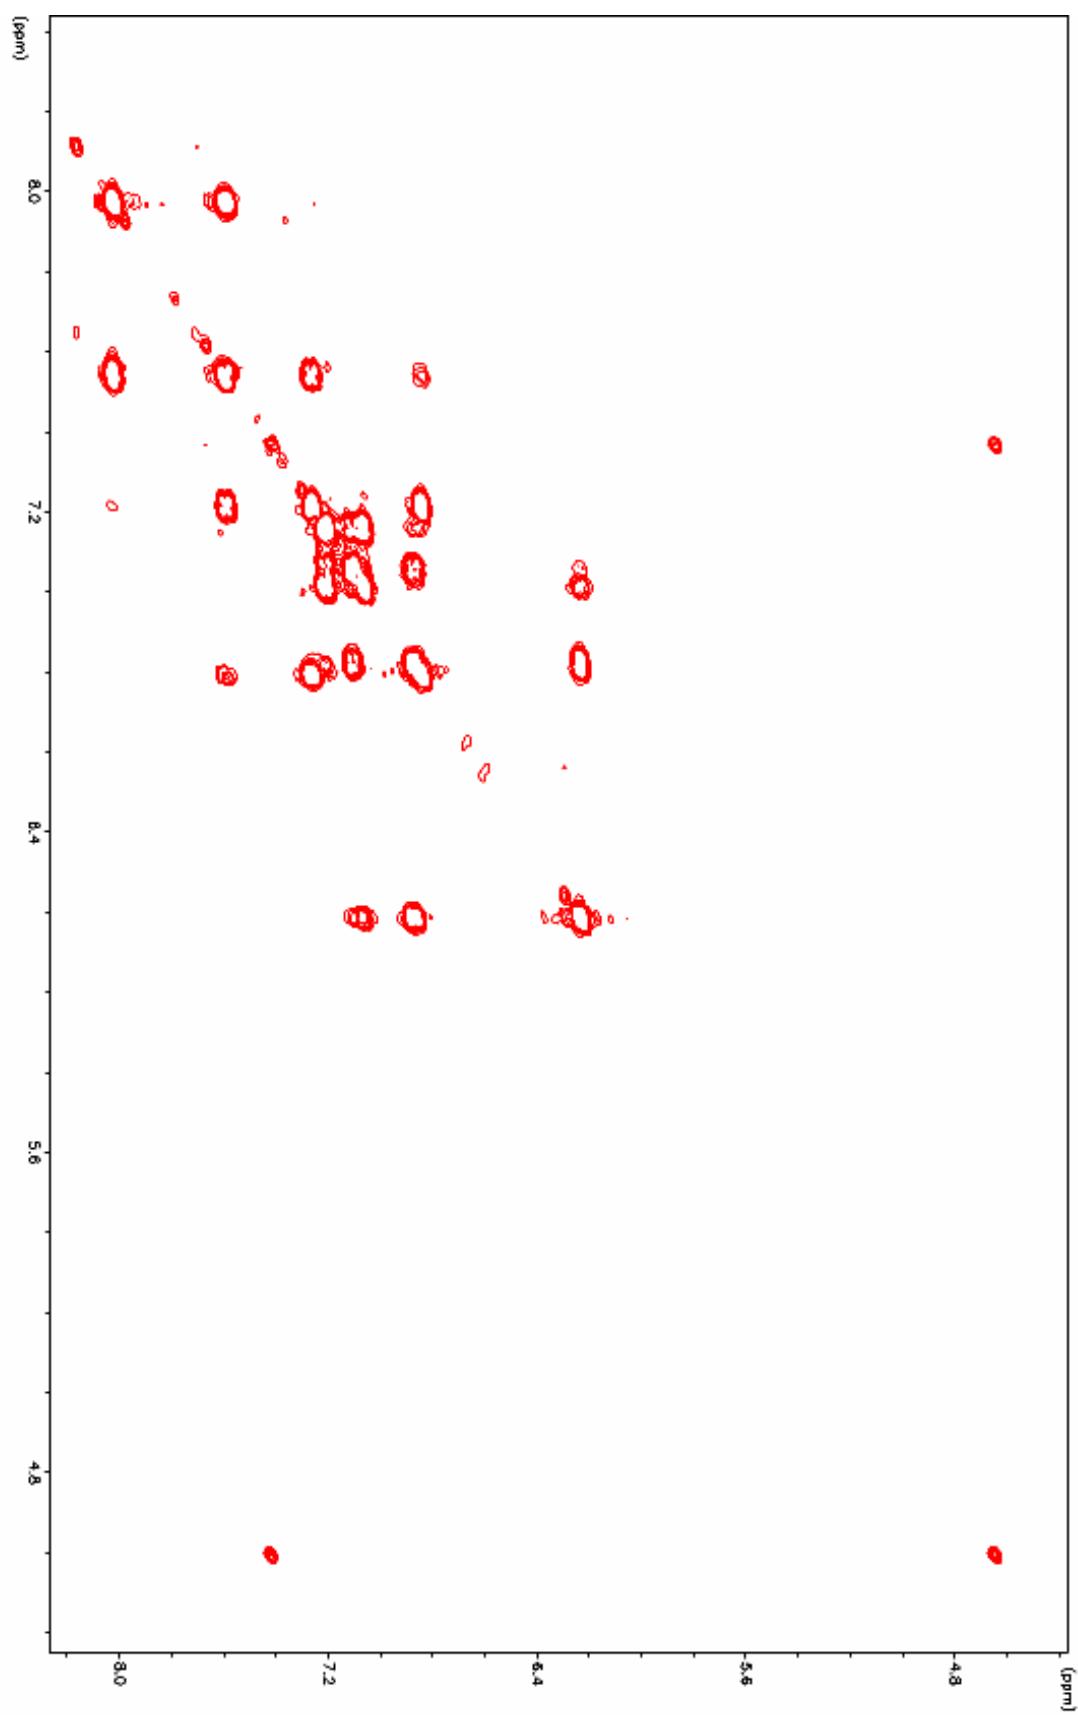

$^1\text{H}$ - $^1\text{H}$  COSY spectrum (500 MHz) of **3d** in  $\text{CDCl}_3$  at 223 K

ROESY, 500 MHz, 223 K,  $\text{CDCl}_3$  (in green are the negative peaks and correlations related to exchange, in black are pure NOE correlations)

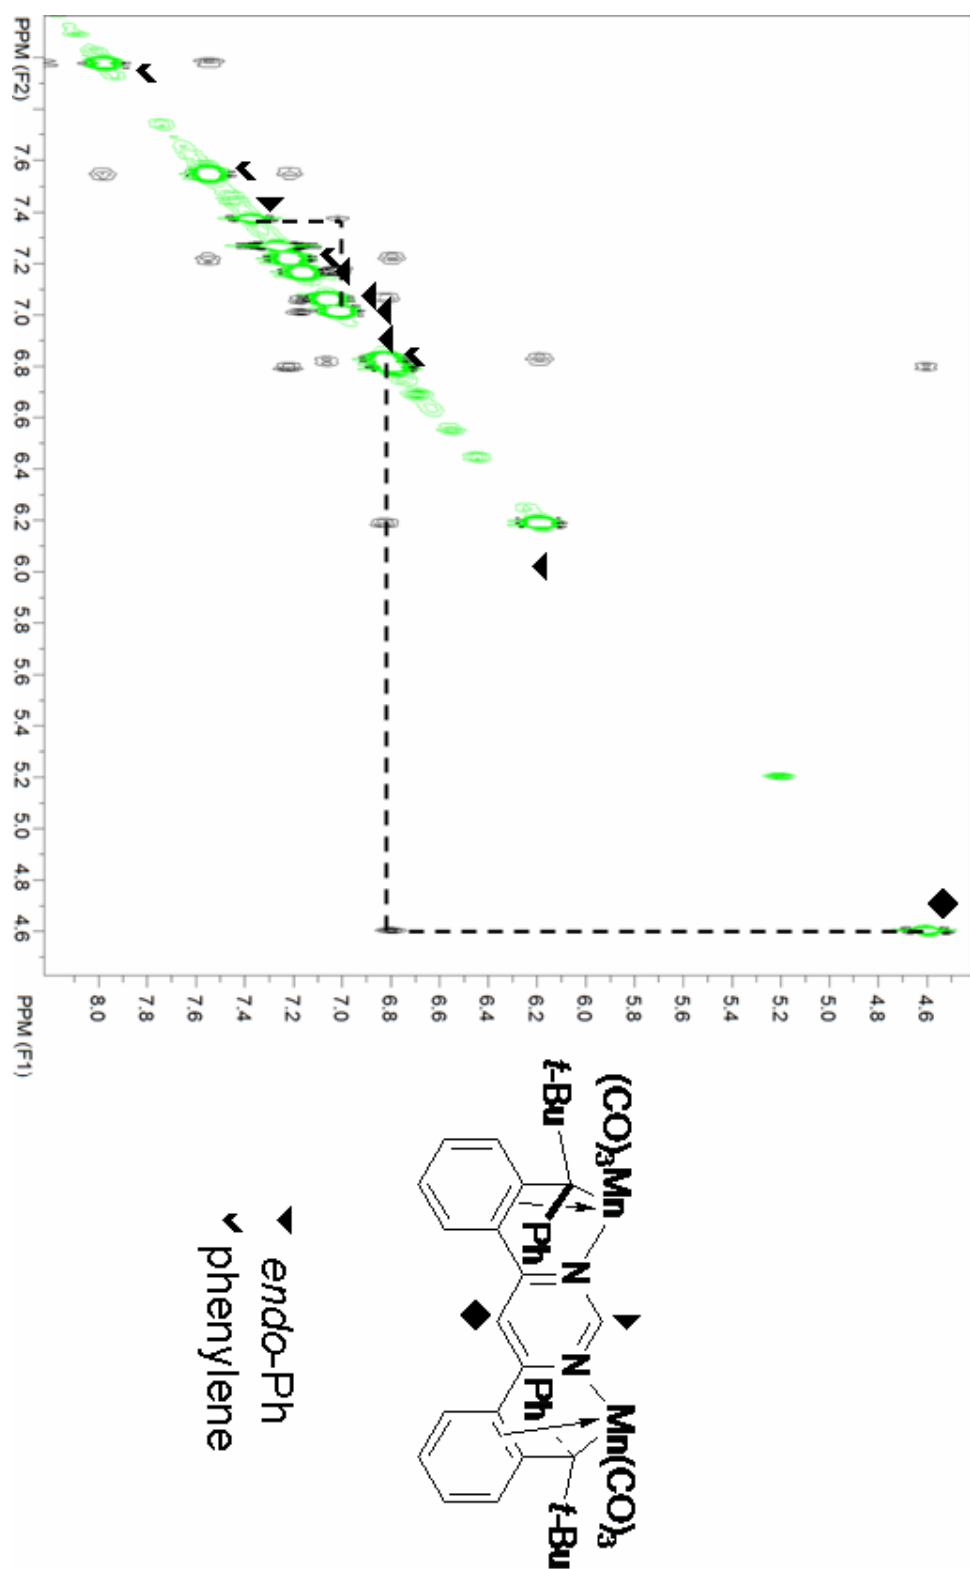

500 MHz  $^1\text{H}$ - $^1\text{H}$  ROESY bi-dimensional spectrum of **3d** in  $\text{CDCl}_3$  at 223 K.

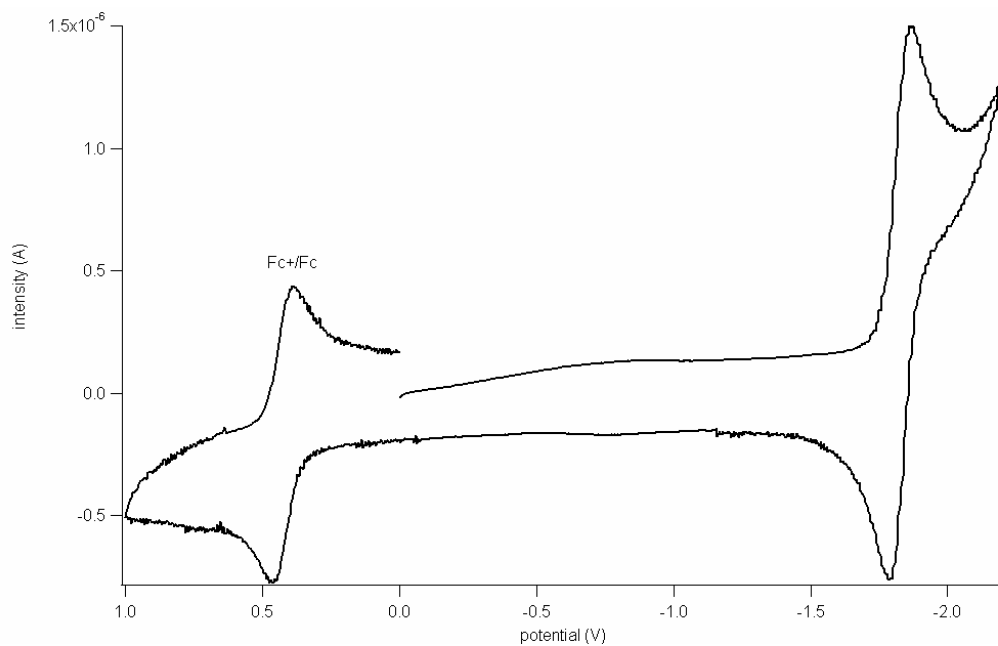

Room temperature cyclic voltammetry of 4,6-diphenylpyrimidine in MeCN ( $10^{-4}$  M); scan rate 200 mV/s.

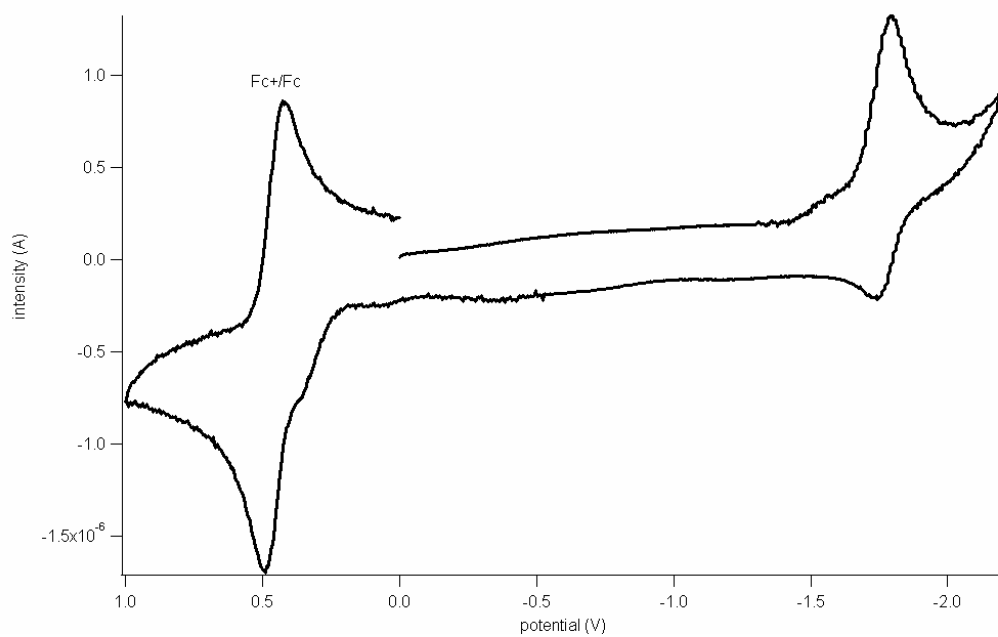

Room temperature cyclic voltammetry of 2,5-diphenylpyrazine in MeCN ( $10^{-4}$  M); scan rate 200 mV/s.

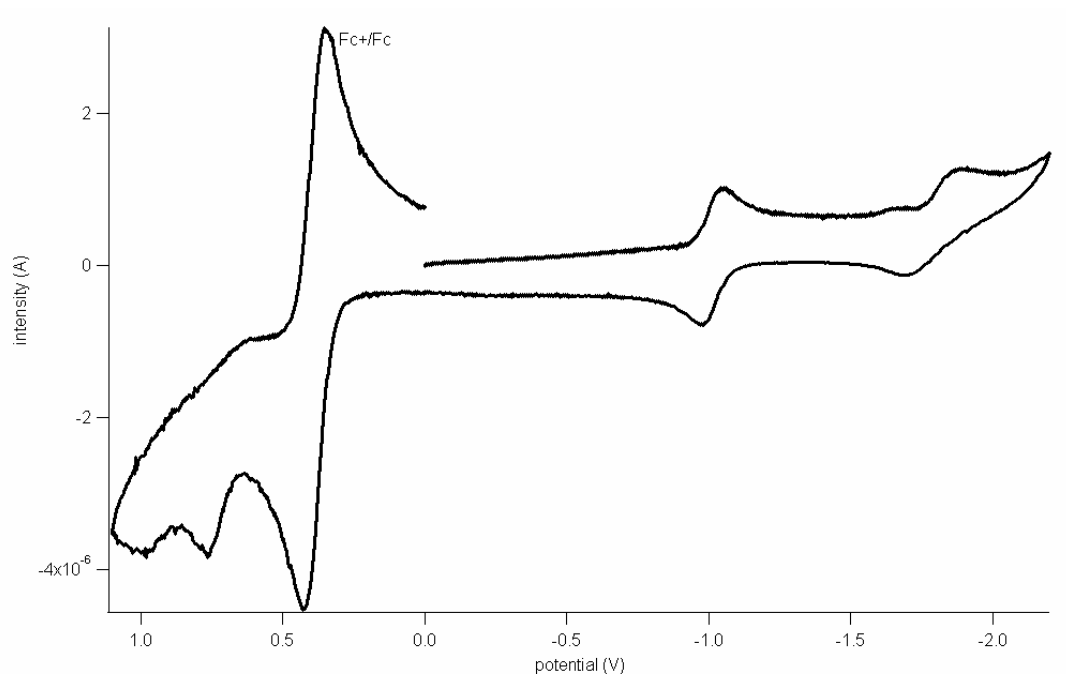

Room temperature cyclic voltammetry of **1c** in MeCN ( $10^{-4}$  M); scan rate 400 mV/s.

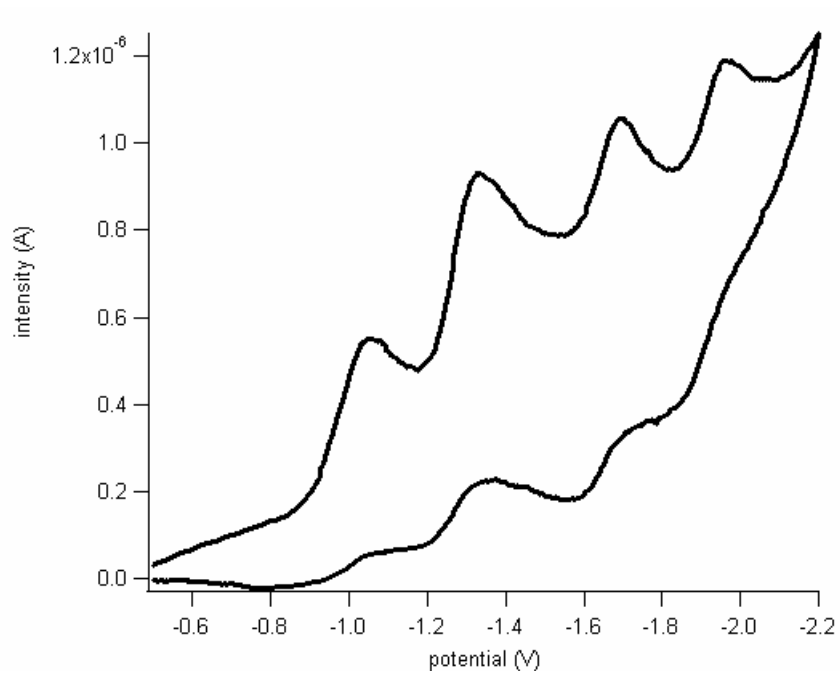

Room temperature cyclic voltammetry of **2b** in THF ( $10^{-4}$  M); scan rate 50 mV/s.

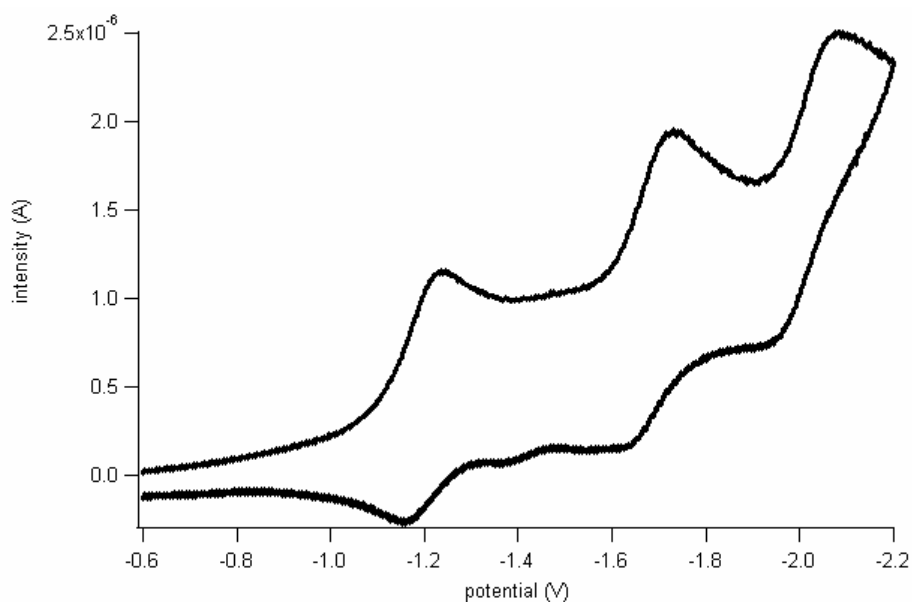

Room temperature cyclic voltammetry of **2c** in MeCN ( $10^{-4}$  M); scan rate 400 mV/s.

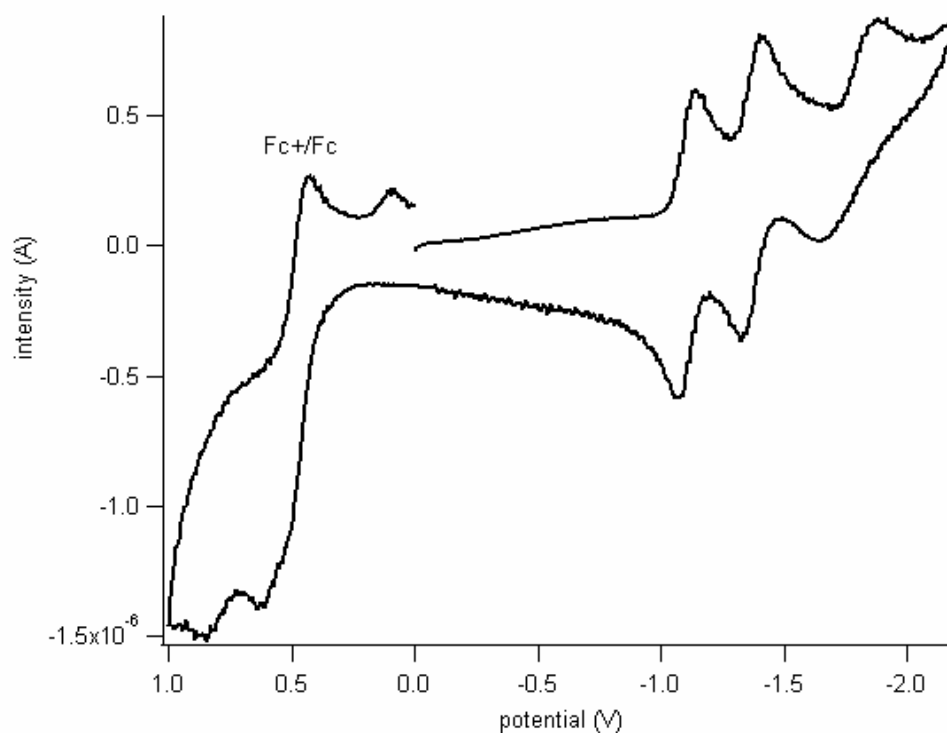

Room temperature cyclic voltammetry of **3b** in MeCN ( $10^{-4}$  M); scan rate 200 mV/s.

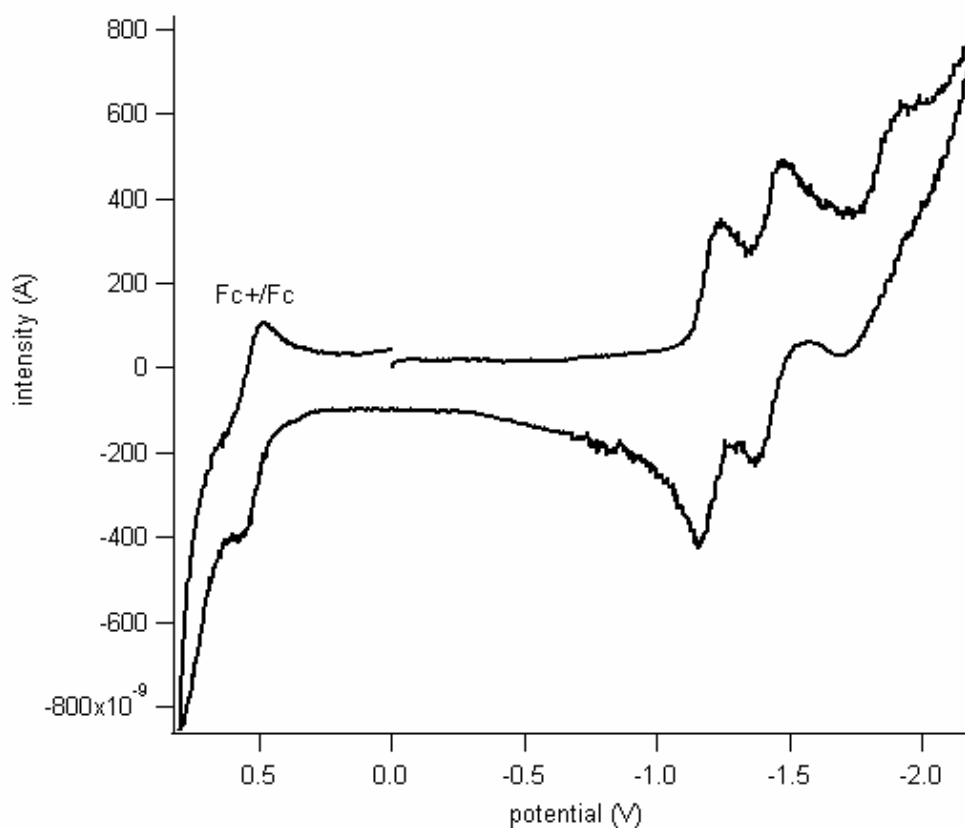

Room temperature cyclic voltammetry of **3d** in MeCN ( $10^{-4}$  M); scan rate 200 mV/s.



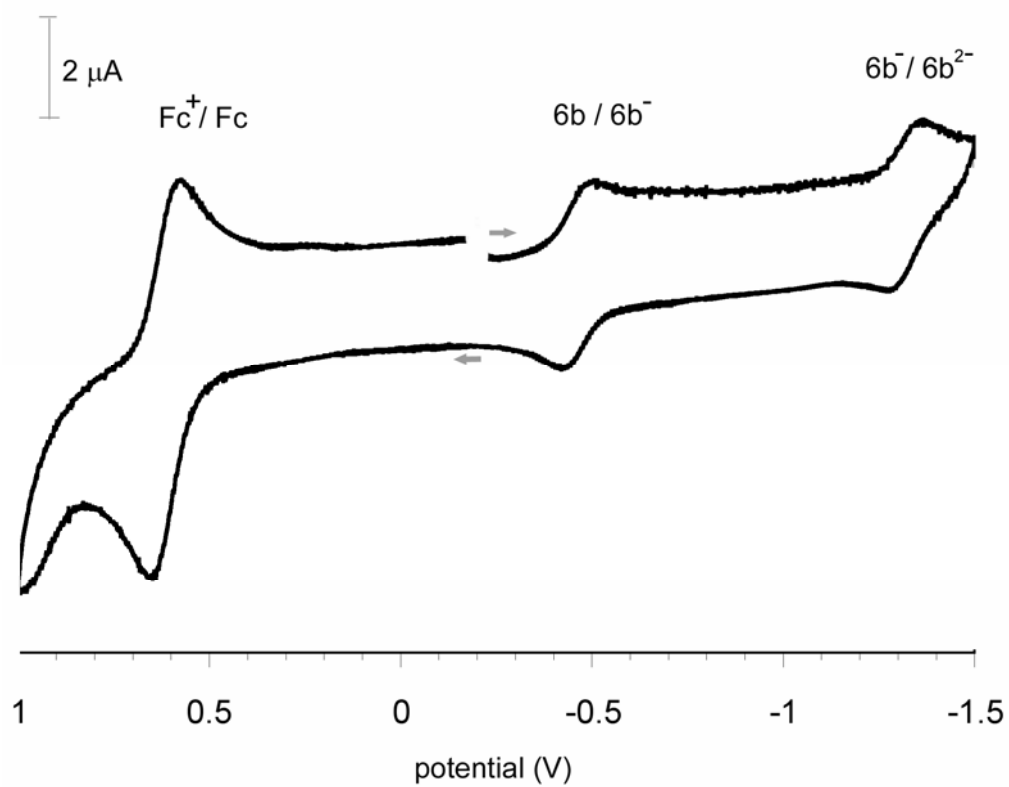

Room temperature cyclic voltammetry of **6b** in MeCN ( $10^{-4}$  M); scan rate 80 mV/s.

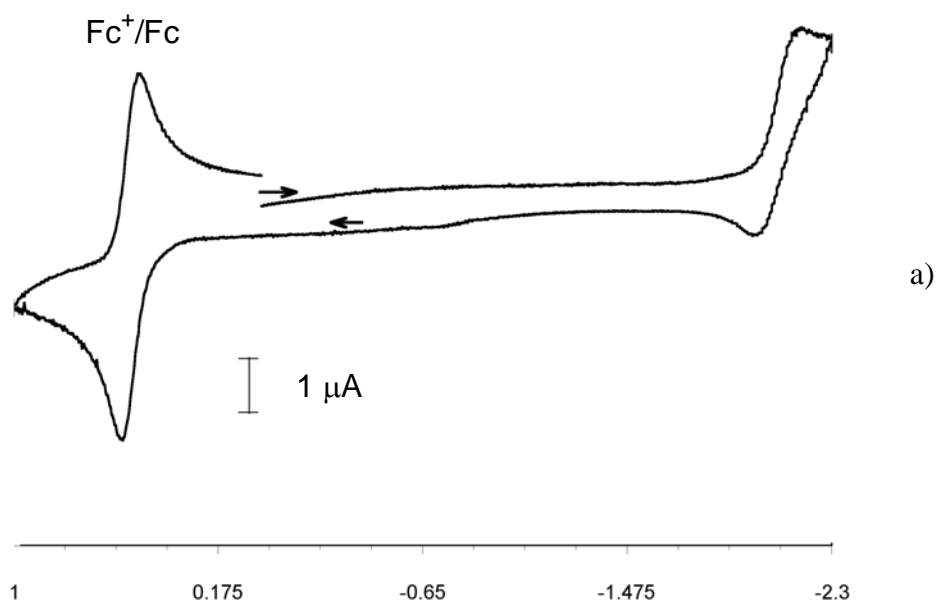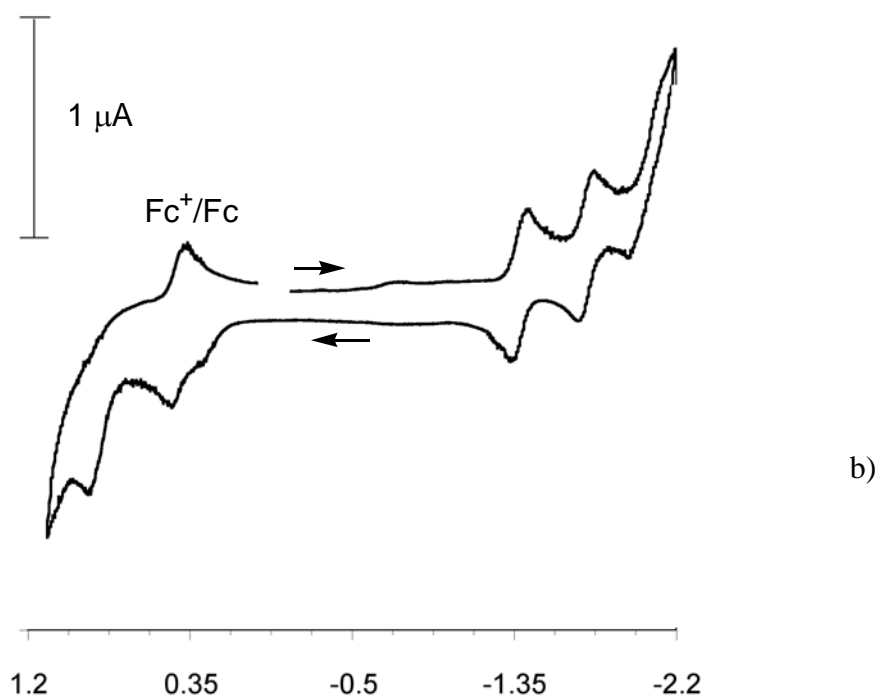

a) Room temperature cyclic voltammetry of **7** in MeCN; scan rate 800 mV/s. b) Room temperature cyclic voltammetry of **8** in MeCN; scan rate 100 mV/s.

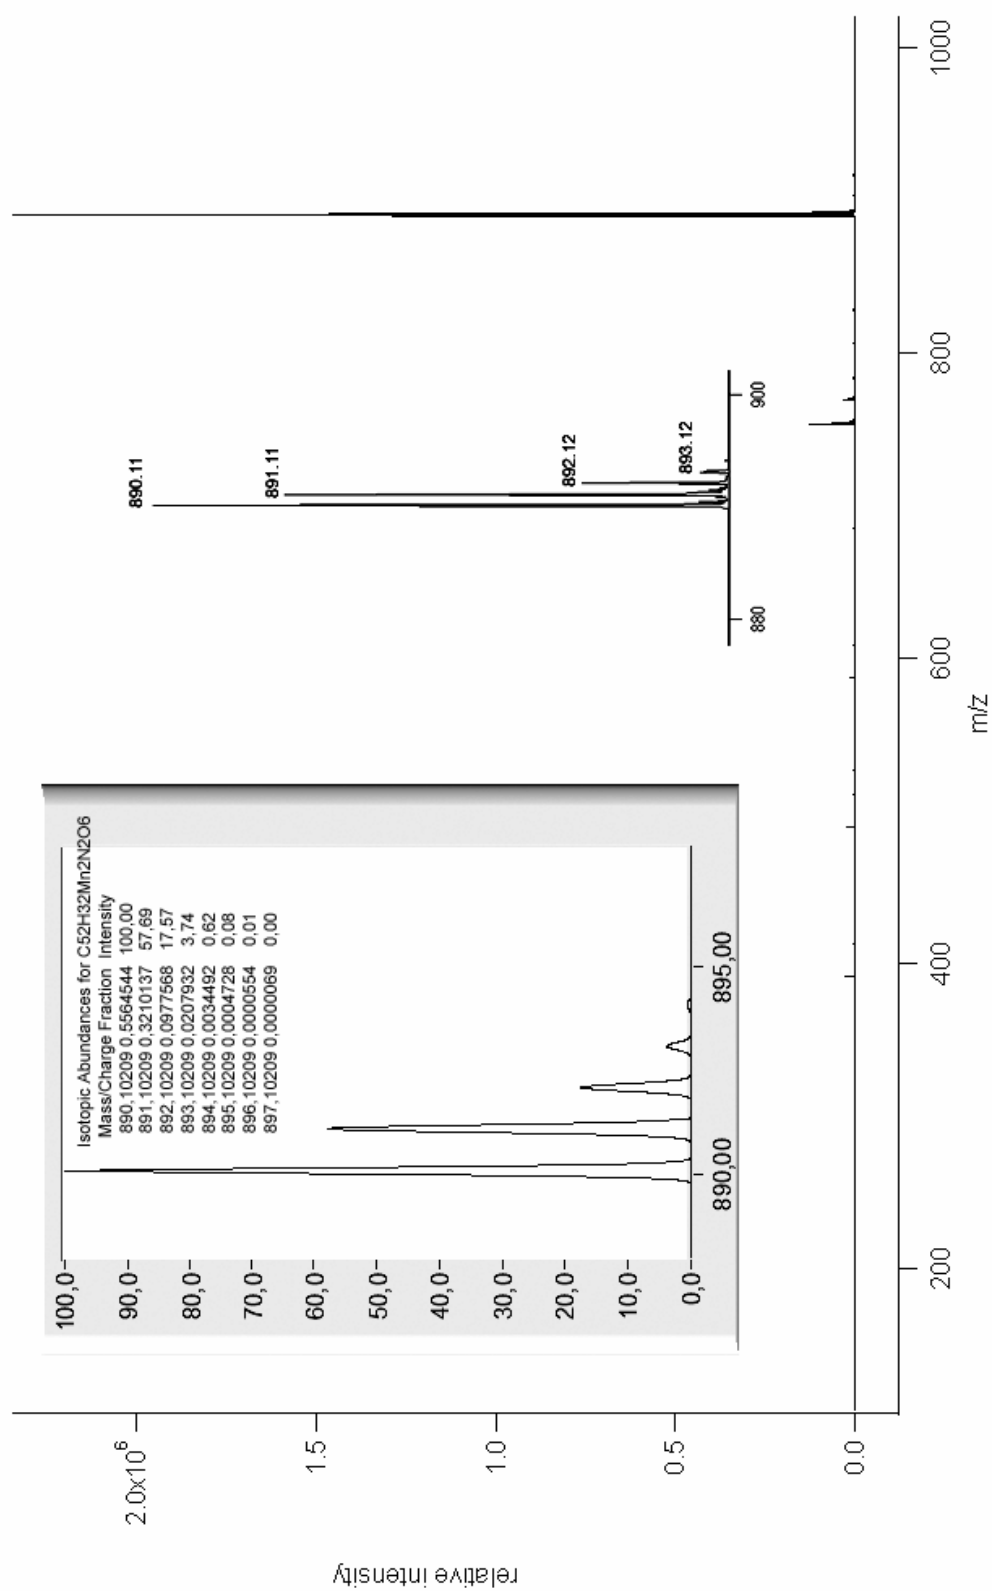Negative mode electrospray mass spectrum of a 1,2-dimethoxyethane solution of [1b]<sup>-</sup>.

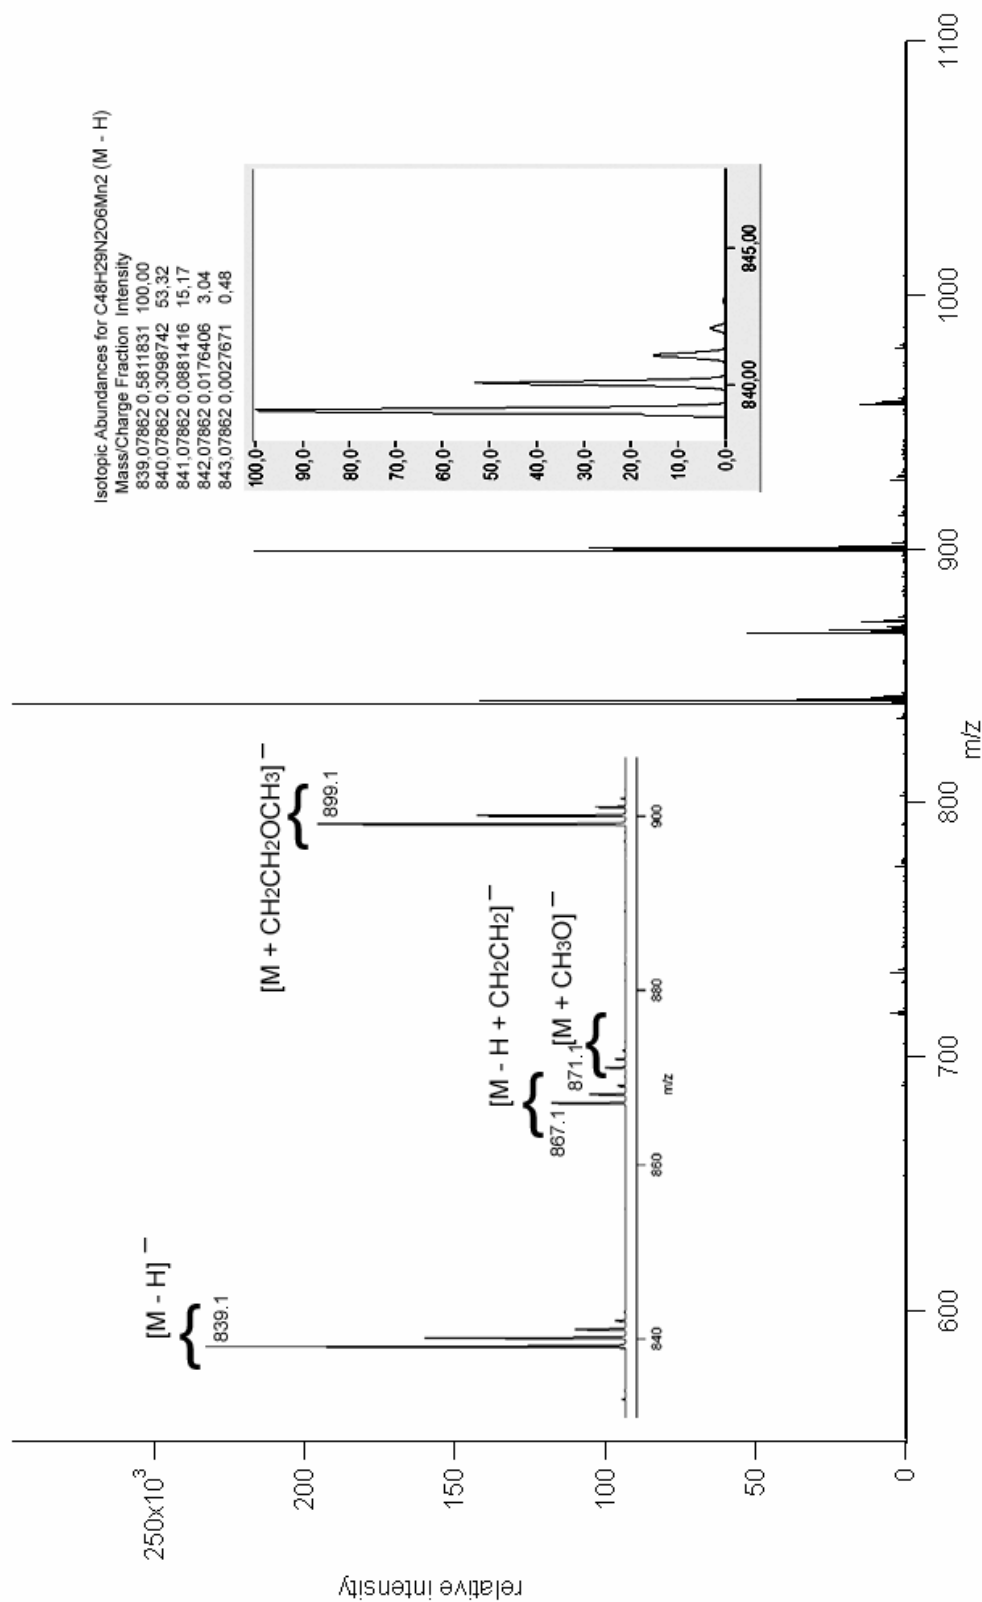

Negative mode electrospray mass spectrum of a solution of  $[3b]^-$  in 1,2-dimethoxyethane: four major peaks are detected and assigned to products of degradation of the radical anion by de-hydrogenation and reaction with the solvent.

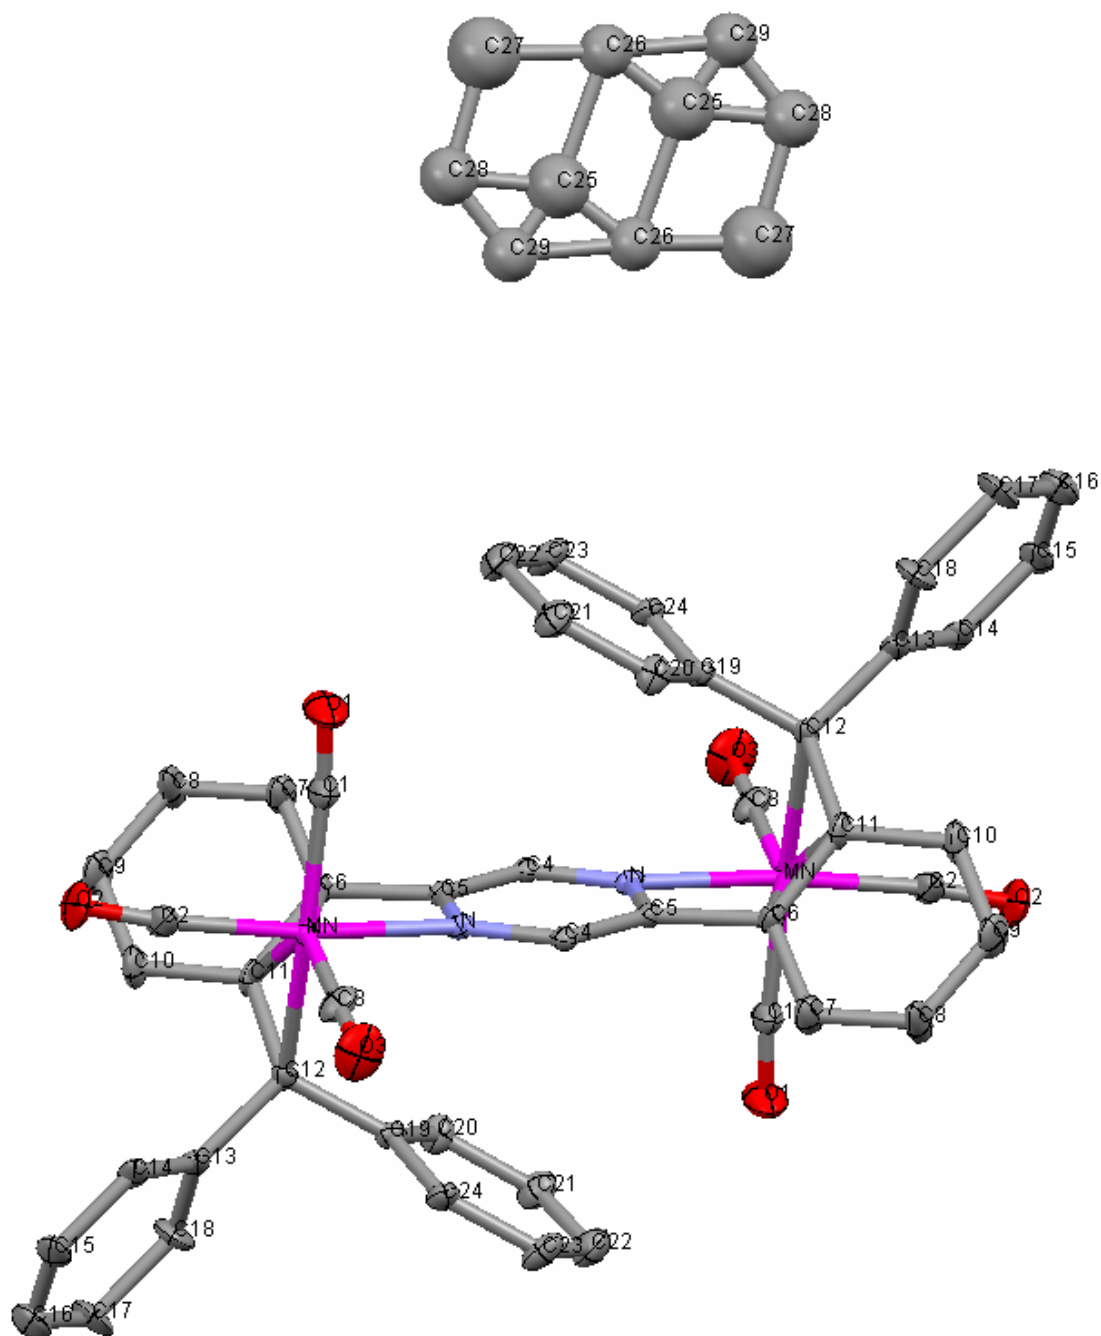

CSD Mercury 1.4 drawing of the structure of **2b**, ellipsoids are drawn at 30 % probability level.

```

#=====
=====
data_global
#=====
=====
_audit_creation_date          4-06-02

# 1. SUBMISSION DETAILS

_publ_contact_author_name    # Name of author for correspondence
;
;
_publ_contact_author_address # Address of author for correspondence
;
;
_publ_contact_author_phone   'xxxxxxxxxxxx'
_publ_contact_author_fax     'xxxxxxxxxxxx'
_publ_contact_author_email   xxx@xx.xx.xx

_publ_requested_journal      'Acta Crystallographica C'
_publ_contact_letter
;
    Please consider this CIF submission for publication as a new structure
    paper in Acta Crystallographica Section C. The figures, chemical
    structure diagram (scheme), Transfert of Copyright Agreement form and
    structure factors will be sent on receipt of your acknowledgement
letter
;

_publ_requested_category      FM
#=====
=====

# 2. PROCESSING SUMMARY (IUCr Office Use Only)

_journal_date_recd_electronic ?

_journal_date_to_coeditor     ?
_journal_date_from_coeditor   ?
_journal_date_accepted        ?

_journal_date_printers_first  ?
_journal_date_printers_final  ?
_journal_date_proofs_out      ?
_journal_date_proofs_in       ?

```

```
_journal_coeditor_name          ?
_journal_coeditor_code          ?
_journal_coeditor_notes
; ?
;

_journal_techeditor_code        ?
_journal_techeditor_notes
; ?
;

_journal_coden_ASTM             ?
_journal_name_full              ?
_journal_year                   ?
_journal_volume                 ?

_journal_issue                  ?
_journal_page_first             ?
_journal_page_last              ?

_journal_suppl_publ_number      ?
_journal_suppl_publ_pages       ?

#=====
=====

# 3. TITLE AND AUTHOR LIST

_publ_section_title
; ?
;

# The loop structure below should contain the names and addresses of all
# authors, in the required order of publication. Repeat as necessary.

loop_
_publ_author_name
_publ_author_address
'Dupont Karl'          #<--'Last name, first name'
; Research School of Chemistry
National Laboratory
Ouchnock
Islandia
;

# 4. TEXT
```

\_publ\_section\_abstract

; ?

;

\_publ\_section\_comment

; ?

;

\_publ\_section\_exptl\_prep

; ?

;

\_publ\_section\_exptl\_refinement

; ?

;

\_publ\_section\_references

;

Burla, M.C., Camalli, M., Cascarano, G.,Giacovazzo, C., Polidori, G.,  
Spagna, R. &Viterbo, D. (1989). SIR. J. Appl. Cryst. 22, 389-393.

OpenMoleN, Interactive Intelligent Structure solution (1997)  
Nonius B.V., Delft, The Netherlands.

KappaCCD Operation Manual (1997), Nonius B.V., Delft, The Netherlands.

Otwinowski, Z. & Minor, W. (1997), Methods in Enzymology, 276, 307-326.

;

\_publ\_section\_figure\_captions

; ?

;

\_publ\_section\_acknowledgements

; ?

;

#=====  
=====



```
# If more than one structure is reported, sections 5-10 should be filled
in
# per structure. For each data set, replace the ? in the data_? line below
# by a unique identifier.
```

```
data_4b
```

```
#=====
=====
```

```
# 5. CHEMICAL DATA
```

```
_chemical_name_systematic
; ?
;
_chemical_name_common           ?
_chemical_formula_moiety        'C60 H40 Mn2 N2 O6'
_chemical_formula_structural    ?
_chemical_formula_analytical    ?
_chemical_formula_sum           'C60 H40 Mn2 N2 O6'
_chemical_formula_weight        994.87
_chemical_melting_point         ?
_chemical_compound_source       ?
```

```
loop_
```

```
  _atom_type_symbol
  _atom_type_description
  _atom_type_scat_dispersion_real
  _atom_type_scat_dispersion_imag
  _atom_type_scat_source
C ? 0.002 0.002 International_Tables_Vol_IV_Table_2.3.1
H ? 0.000 0.000 International_Tables_Vol_IV_Table_2.3.1
Mn ? 0.295 0.729 International_Tables_Vol_IV_Table_2.3.1
N ? 0.004 0.003 International_Tables_Vol_IV_Table_2.3.1
O ? 0.008 0.006 International_Tables_Vol_IV_Table_2.3.1
```

```
#=====
=====
```

```
# 6. CRYSTAL DATA
```

```
_symmetry_cell_setting          triclinic
_symmetry_space_group_name_H-M  'P-1'
_symmetry_space_group_name_Hall '-P 1'
loop_
```

```

    _symmetry_equiv_pos_as_xyz
      'x,y,z'
      -x,-y,-z
_cell_length_a          9.3024(3)
_cell_length_b          10.4576(3)
_cell_length_c          15.1807(6)
_cell_angle_alpha       88.237(5)
_cell_angle_beta        85.895(5)
_cell_angle_gamma       73.054(5)
_cell_volume            1408.97(8)
_cell_formula_units_Z   1
_cell_measurement_temperature 294
_cell_measurement_reflns_used ?
_cell_measurement_theta_min ?
_cell_measurement_theta_max ?
_cell_special_details
;
Cell parameters refined using Scalepack part of DENZO
  Z. Otwinowski, W. Minor, 1997
;

_exptl_crystal_description      prism
_exptl_crystal_colour           'colorless'
_exptl_crystal_size_max        0.01
_exptl_crystal_size_mid        0.01
_exptl_crystal_size_min        0.01
_exptl_crystal_density_meas    ?
_exptl_crystal_density_diffn   1.17
_exptl_crystal_density_method  'none'

_exptl_crystal_F_000           512
_exptl_absorpt_coefficient_mu  0.496
_exptl_absorpt_correction_type none
_exptl_absorpt_correction_T_min ?
_exptl_absorpt_correction_T_max ?
#=====
=====

# 7. EXPERIMENTAL DATA

_diffrn_special_details
; ?
;

_diffrn_ambient_temperature    294
_diffrn_radiation_wavelength   0.71073
_diffrn_radiation_type         Mo-K\alpha

```

```

_diffrn_source                xray_tube

_diffrn_radiation_monochromator  graphite
_diffrn_measurement_device_type  KappaCCD
_diffrn_measurement_method      '\p scans'

_diffrn_measurement_details
;
  7762 reflections were collected using program Collect
  ("Collect" Data collection software, Nonius B.V., 1998)
  The conditions were as follow : crystal to detector distance = 36. mm.
  Scan angle = 2.0 deg 1 scans of 50 sec per frame.
  Data collection was divided into 2 set(s)
  with the following starting angles and number of frames :

  Set 1 Theta = 6.30 Omega = 0.00 Kappa = 0.00 91 frames
  Set 2 Theta = -6.30 Kappa = -111.00 Phi = 0.00 24 frames
  Friedel pairs were averaged. Internal R = 0.04
;

_diffrn_standards_number      ?
_diffrn_standards_interval_count ?
_diffrn_standards_interval_time ?
_diffrn_standards_decay_%     0

_diffrn_reflns_number         7762
_diffrn_reflns_av_R_equivalents 0.040
_diffrn_reflns_av_sigmaI/netI 0.333
_diffrn_reflns_limit_h_min    -11
_diffrn_reflns_limit_h_max    12
_diffrn_reflns_limit_k_min    -13
_diffrn_reflns_limit_k_max    8
_diffrn_reflns_limit_l_min    -17
_diffrn_reflns_limit_l_max    19
_diffrn_reflns_theta_min      2.5
_diffrn_reflns_theta_max     27.47

_reflns_number_total         6067
_reflns_number_gt           4434
_reflns_threshold_expression  >3.0\s(I)

_computing_structure_solution  Direct_methods_(SIR,_Burla_et_al.,_1989)
_computing_structure_refinement LSFM_OpenMoleN_(1997)
_computing_molecular_graphics  ?
_computing_publication_material CIFGEN_IN_OpenMoleN_(1997)

```

```
#=====
=====
```

## # 8. REFINEMENT DATA

```
_refine_ls_structure_factor_coef  F
_refine_ls_matrix_type            full
_refine_ls_weighting_scheme       sigma
_refine_ls_hydrogen_treatment     noref
_refine_ls_extinction_method      none
_refine_ls_extinction_expression  ?
_refine_ls_extinction_coef        ?
_refine_ls_abs_structure_Flack    ?
_refine_ls_number_reflns         4434
_refine_ls_number_parameters      282
_refine_ls_number_restraints      0
_refine_ls_number_constraints     0
_refine_ls_R_factor_all           0.177
_refine_ls_R_factor_gt            0.154
_refine_ls_wR_factor_all          0.591
_refine_ls_wR_factor_ref          0.237
_refine_ls_goodness_of_fit_all    10.444
_refine_ls_goodness_of_fit_ref    4.130
_refine_ls_shift/su_max           *****
_refine_ls_shift/esd_mean         0.453
_refine_diff_density_max          4.015
_refine_diff_density_min          -0.943
```

```
#=====
=====
```

## # 9. ATOMIC COORDINATES AND THERMAL PARAMETERS

```
loop_
_atom_site_label
_atom_site_fract_x
_atom_site_fract_y
_atom_site_fract_z
_atom_site_U_iso_or_equiv
_atom_site_occupancy
_atom_site_thermal_displace_type
_atom_site_calc_flag
_atom_site_calc_attached_atom
_atom_site_type_symbol
MN  0.9315(1)  0.0042(1)  0.28605(8)  0.0198(5)  1.000  Uani  ? ?  Mn
C1  1.089(1)  -0.150(1)  0.2690(7)  0.033(5)  1.000  Uani  ? ?  C
```

Electronic Supporting Information

|                              |           |            |           |            |           |            |    |   |
|------------------------------|-----------|------------|-----------|------------|-----------|------------|----|---|
| O1                           | 1.180(1)  | -0.2414(9) | 0.2521(6) | 0.058(5)   | 1.000     | Uani       | ?? | O |
| C2                           | 0.941(1)  | 0.024(1)   | 0.1662(7) | 0.032(5)   | 1.000     | Uani       | ?? | C |
| O2                           | 0.9568(9) | 0.026(1)   | 0.0925(5) | 0.042(5)   | 1.000     | Uani       | ?? | O |
| C3                           | 0.783(1)  | -0.075(1)  | 0.2798(7) | 0.036(5)   | 1.000     | Uani       | ?? | C |
| O3                           | 0.6875(8) | -0.1208(8) | 0.2776(6) | 0.065(4)   | 1.000     | Uani       | ?? | O |
| N                            | 0.9496(7) | -0.0117(6) | 0.4183(5) | 0.019(3)   | 1.000     | Uani       | ?? | N |
| C4                           | 0.9112(8) | -0.0805(8) | 0.4868(6) | 0.019(4)   | 1.000     | Uani       | ?? | C |
| C5                           | 1.0368(8) | 0.0694(8)  | 0.4313(6) | 0.019(4)   | 1.000     | Uani       | ?? | C |
| C6                           | 1.0625(9) | 0.1415(9)  | 0.3480(6) | 0.024(4)   | 1.000     | Uani       | ?? | C |
| C7                           | 1.212(1)  | 0.143(1)   | 0.3265(7) | 0.041(5)   | 1.000     | Uani       | ?? | C |
| C8                           | 1.244(1)  | 0.216(1)   | 0.2538(7) | 0.051(5)   | 1.000     | Uani       | ?? | C |
| C9                           | 1.127(1)  | 0.281(1)   | 0.1983(8) | 0.047(5)   | 1.000     | Uani       | ?? | C |
| C10                          | 0.982(1)  | 0.284(1)   | 0.2198(7) | 0.037(5)   | 1.000     | Uani       | ?? | C |
| C11                          | 0.9434(9) | 0.2098(8)  | 0.2976(6) | 0.027(4)   | 1.000     | Uani       | ?? | C |
| C12                          | 0.7854(8) | 0.2026(8)  | 0.3124(6) | 0.021(4)   | 1.000     | Uani       | ?? | C |
| C13                          | 0.6742(9) | 0.284(1)   | 0.2491(6) | 0.025(4)   | 1.000     | Uani       | ?? | C |
| C14                          | 0.6259(9) | 0.232(1)   | 0.1758(6) | 0.026(4)   | 1.000     | Uani       | ?? | C |
| C15                          | 0.528(1)  | 0.313(1)   | 0.1220(7) | 0.036(5)   | 1.000     | Uani       | ?? | C |
| C16                          | 0.474(1)  | 0.447(1)   | 0.1369(8) | 0.047(6)   | 1.000     | Uani       | ?? | C |
| C17                          | 0.513(2)  | 0.507(2)   | 0.2108(9) | 0.065(7)   | 1.000     | Uani       | ?? | C |
| C18                          | 0.618(1)  | 0.423(1)   | 0.2662(8) | 0.043(6)   | 1.000     | Uani       | ?? | C |
| C19                          | 0.7099(8) | 0.2182(8)  | 0.4043(6) | 0.021(4)   | 1.000     | Uani       | ?? | C |
| C20                          | 0.749(1)  | 0.2893(9)  | 0.4689(7) | 0.032(4)   | 1.000     | Uani       | ?? | C |
| C21                          | 0.677(1)  | 0.304(1)   | 0.5547(7) | 0.037(5)   | 1.000     | Uani       | ?? | C |
| C22                          | 0.562(1)  | 0.241(1)   | 0.5749(7) | 0.042(5)   | 1.000     | Uani       | ?? | C |
| C23                          | 0.520(1)  | 0.174(1)   | 0.5100(7) | 0.037(5)   | 1.000     | Uani       | ?? | C |
| C24                          | 0.5918(9) | 0.162(1)   | 0.4246(6) | 0.027(4)   | 1.000     | Uani       | ?? | C |
| C25                          | 0.051(4)  | 0.460(4)   | 0.547(3)  | 0.11(1)    | 0.500     | Uiso       | ?? | C |
| C26                          | 0.124(1)  | 0.435(1)   | 0.4787(8) | 0.077(3)   | 1.000     | Uiso       | ?? | C |
| C27                          | -0.119(6) | 0.539(6)   | 0.621(4)  | 0.14(2)    | 0.500     | Uiso       | ?? | C |
| C28                          | 0.040(4)  | 0.444(4)   | 0.637(3)  | 0.09(1)    | 0.500     | Uiso       | ?? | C |
| C29                          | 0.143(4)  | 0.408(4)   | 0.581(3)  | 0.08(1)    | 0.500     | Uiso       | ?? | C |
| loop_                        |           |            |           |            |           |            |    |   |
| _atom_site_aniso_label       |           |            |           |            |           |            |    |   |
| _atom_site_aniso_U_11        |           |            |           |            |           |            |    |   |
| _atom_site_aniso_U_22        |           |            |           |            |           |            |    |   |
| _atom_site_aniso_U_33        |           |            |           |            |           |            |    |   |
| _atom_site_aniso_U_12        |           |            |           |            |           |            |    |   |
| _atom_site_aniso_U_13        |           |            |           |            |           |            |    |   |
| _atom_site_aniso_U_23        |           |            |           |            |           |            |    |   |
| _atom_site_aniso_type_symbol |           |            |           |            |           |            |    |   |
| MN                           | 0.0191(5) | 0.0265(6)  | 0.0152(5) | -0.0051(4) | 0.0011(5) | -0.0013(5) | Mn |   |
| C1                           | 0.036(5)  | 0.043(5)   | 0.024(5)  | 0.002(4)   | -0.001(4) | 0.001(4)   | C  |   |
| O1                           | 0.070(5)  | 0.057(5)   | 0.048(5)  | 0.034(4)   | 0.007(4)  | -0.002(4)  | O  |   |
| C2                           | 0.023(4)  | 0.059(6)   | 0.024(4)  | -0.008(4)  | -0.005(4) | 0.001(4)   | C  |   |

Electronic Supporting Information

|     |          |          |          |           |           |           |   |
|-----|----------|----------|----------|-----------|-----------|-----------|---|
| O2  | 0.064(5) | 0.086(6) | 0.014(3) | -0.008(4) | 0.003(3)  | -0.004(4) | O |
| C3  | 0.038(4) | 0.037(5) | 0.033(5) | -0.012(4) | 0.011(4)  | -0.013(4) | C |
| O3  | 0.064(3) | 0.078(4) | 0.056(5) | -0.056(2) | -0.008(3) | -0.010(4) | O |
| N   | 0.016(3) | 0.020(3) | 0.021(3) | -0.008(2) | 0.000(3)  | -0.003(3) | N |
| C4  | 0.016(3) | 0.017(3) | 0.024(4) | -0.002(3) | 0.000(3)  | 0.002(3)  | C |
| C5  | 0.016(3) | 0.020(4) | 0.021(4) | -0.004(3) | 0.002(3)  | 0.004(3)  | C |
| C6  | 0.018(4) | 0.036(4) | 0.021(4) | -0.009(3) | -0.002(3) | 0.008(3)  | C |
| C7  | 0.029(4) | 0.059(6) | 0.039(5) | -0.021(4) | -0.005(4) | 0.022(5)  | C |
| C8  | 0.030(4) | 0.090(6) | 0.049(6) | -0.026(4) | -0.007(4) | 0.046(5)  | C |
| C9  | 0.041(4) | 0.059(5) | 0.042(6) | -0.030(4) | 0.003(4)  | 0.020(4)  | C |
| C10 | 0.044(4) | 0.047(5) | 0.025(4) | -0.025(3) | -0.006(4) | 0.017(4)  | C |
| C11 | 0.031(4) | 0.031(4) | 0.021(4) | -0.017(3) | 0.004(3)  | 0.007(3)  | C |
| C12 | 0.016(3) | 0.027(4) | 0.023(4) | -0.007(3) | -0.005(3) | 0.007(3)  | C |
| C13 | 0.015(3) | 0.043(5) | 0.025(4) | -0.005(3) | -0.000(3) | 0.008(4)  | C |
| C14 | 0.014(3) | 0.051(5) | 0.024(4) | -0.013(3) | -0.005(3) | 0.007(4)  | C |
| C15 | 0.019(4) | 0.065(6) | 0.038(5) | -0.010(4) | -0.011(4) | 0.019(5)  | C |
| C16 | 0.033(5) | 0.071(7) | 0.044(6) | -0.002(5) | -0.014(4) | 0.014(6)  | C |
| C17 | 0.041(6) | 0.11(1)  | 0.062(7) | 0.024(6)  | -0.015(5) | 0.045(6)  | C |
| C18 | 0.035(5) | 0.044(6) | 0.053(6) | 0.015(5)  | -0.009(5) | 0.020(5)  | C |
| C19 | 0.016(3) | 0.025(4) | 0.023(4) | -0.006(3) | -0.001(3) | -0.002(3) | C |
| C20 | 0.038(4) | 0.029(4) | 0.030(5) | -0.016(3) | 0.001(4)  | -0.004(4) | C |
| C21 | 0.039(5) | 0.043(5) | 0.032(5) | -0.013(4) | 0.004(4)  | -0.012(4) | C |
| C22 | 0.038(5) | 0.055(6) | 0.034(5) | -0.015(4) | 0.009(4)  | -0.007(5) | C |
| C23 | 0.029(4) | 0.048(5) | 0.037(5) | -0.021(3) | 0.012(4)  | -0.016(4) | C |
| C24 | 0.017(4) | 0.040(5) | 0.029(5) | -0.006(3) | 0.002(3)  | 0.002(4)  | C |

# 10. MOLECULAR GEOMETRY

loop\_

\_geom\_bond\_atom\_site\_label\_1

\_geom\_bond\_atom\_site\_label\_2

\_geom\_bond\_distance

\_geom\_bond\_site\_symmetry\_1

\_geom\_bond\_site\_symmetry\_2

\_geom\_bond\_publ\_flag

|    |    |          |       |
|----|----|----------|-------|
| MN | C1 | 1.841(9) | . . ? |
| MN | C2 | 1.82(1)  | . . ? |
| MN | C3 | 1.82(1)  | . . ? |
| C1 | O1 | 1.11(1)  | . . ? |
| C2 | O2 | 1.12(1)  | . . ? |
| C3 | O3 | 1.12(1)  | . . ? |
| N  | C4 | 1.33(1)  | . . ? |
| N  | C5 | 1.36(1)  | . . ? |
| C5 | C6 | 1.49(1)  | . . ? |
| C6 | C7 | 1.42(1)  | . . ? |

|     |     |         |           |
|-----|-----|---------|-----------|
| C6  | C11 | 1.40(1) | . . ?     |
| C7  | C8  | 1.38(2) | . . ?     |
| C8  | C9  | 1.42(1) | . . ?     |
| C9  | C10 | 1.36(1) | . . ?     |
| C10 | C11 | 1.47(1) | . . ?     |
| C11 | C12 | 1.49(1) | . . ?     |
| C12 | C13 | 1.51(1) | . . ?     |
| C12 | C19 | 1.51(1) | . . ?     |
| C13 | C14 | 1.41(1) | . . ?     |
| C13 | C18 | 1.42(1) | . . ?     |
| C14 | C15 | 1.36(1) | . . ?     |
| C15 | C16 | 1.36(2) | . . ?     |
| C16 | C17 | 1.42(2) | . . ?     |
| C17 | C18 | 1.42(2) | . . ?     |
| C19 | C20 | 1.38(1) | . . ?     |
| C19 | C24 | 1.40(1) | . . ?     |
| C20 | C21 | 1.41(1) | . . ?     |
| C21 | C22 | 1.43(2) | . . ?     |
| C22 | C23 | 1.37(2) | . . ?     |
| C23 | C24 | 1.41(1) | . . ?     |
| C25 | C25 | 1.83(6) | . 2_566 ? |
| C25 | C26 | 1.19(4) | . . ?     |
| C25 | C26 | 1.74(4) | . 2_566 ? |
| C25 | C27 | 1.87(7) | . . ?     |
| C25 | C28 | 1.37(6) | . . ?     |
| C25 | C29 | 1.03(5) | . . ?     |
| C26 | C27 | 1.53(6) | . 2_566 ? |
| C26 | C29 | 1.59(4) | . . ?     |
| C27 | C28 | 1.55(6) | . . ?     |
| C28 | C29 | 1.22(5) | . . ?     |

loop\_

|                                 |
|---------------------------------|
| _geom_contact_atom_site_label_1 |
| _geom_contact_atom_site_label_2 |
| _geom_contact_distance          |
| _geom_contact_site_symmetry_1   |
| _geom_contact_site_symmetry_2   |
| _geom_contact_publ_flag         |
| ? ? ? ? ? ?                     |

loop\_

|                               |
|-------------------------------|
| _geom_angle_atom_site_label_1 |
| _geom_angle_atom_site_label_2 |
| _geom_angle_atom_site_label_3 |
| _geom_angle                   |
| _geom_angle_site_symmetry_1   |
| _geom_angle_site_symmetry_2   |

\_geom\_angle\_site\_symmetry\_3\_geom\_angle\_publ\_flag

|     |     |     |          |       |   |       |   |
|-----|-----|-----|----------|-------|---|-------|---|
| C1  | MN  | C2  | 86.4(4)  | .     | . | .     | ? |
| C1  | MN  | C3  | 95.8(5)  | .     | . | .     | ? |
| C2  | MN  | C3  | 90.1(5)  | .     | . | .     | ? |
| MN  | C1  | O1  | 174(1)   | .     | . | .     | ? |
| MN  | C2  | O2  | 173.9(9) | .     | . | .     | ? |
| MN  | C3  | O3  | 177.5(8) | .     | . | .     | ? |
| C4  | N   | C5  | 118.8(7) | .     | . | .     | ? |
| N   | C5  | C6  | 110.8(8) | .     | . | .     | ? |
| C5  | C6  | C7  | 116.0(8) | .     | . | .     | ? |
| C5  | C6  | C11 | 121.5(8) | .     | . | .     | ? |
| C7  | C6  | C11 | 122.4(9) | .     | . | .     | ? |
| C6  | C7  | C8  | 119.6(9) | .     | . | .     | ? |
| C7  | C8  | C9  | 119(1)   | .     | . | .     | ? |
| C8  | C9  | C10 | 121(1)   | .     | . | .     | ? |
| C9  | C10 | C11 | 120.7(9) | .     | . | .     | ? |
| C6  | C11 | C10 | 116.4(8) | .     | . | .     | ? |
| C6  | C11 | C12 | 124.8(8) | .     | . | .     | ? |
| C10 | C11 | C12 | 118.6(7) | .     | . | .     | ? |
| C11 | C12 | C13 | 116.0(8) | .     | . | .     | ? |
| C11 | C12 | C19 | 119.8(8) | .     | . | .     | ? |
| C13 | C12 | C19 | 108.4(6) | .     | . | .     | ? |
| C12 | C13 | C14 | 125.3(8) | .     | . | .     | ? |
| C12 | C13 | C18 | 115.7(9) | .     | . | .     | ? |
| C14 | C13 | C18 | 119.0(9) | .     | . | .     | ? |
| C13 | C14 | C15 | 120.9(9) | .     | . | .     | ? |
| C14 | C15 | C16 | 120(1)   | .     | . | .     | ? |
| C15 | C16 | C17 | 121(1)   | .     | . | .     | ? |
| C16 | C17 | C18 | 117(1)   | .     | . | .     | ? |
| C13 | C18 | C17 | 119(1)   | .     | . | .     | ? |
| C12 | C19 | C20 | 122.6(8) | .     | . | .     | ? |
| C12 | C19 | C24 | 119.1(8) | .     | . | .     | ? |
| C20 | C19 | C24 | 118.3(8) | .     | . | .     | ? |
| C19 | C20 | C21 | 122(1)   | .     | . | .     | ? |
| C20 | C21 | C22 | 118(1)   | .     | . | .     | ? |
| C21 | C22 | C23 | 119(1)   | .     | . | .     | ? |
| C22 | C23 | C24 | 121(1)   | .     | . | .     | ? |
| C19 | C24 | C23 | 120.6(9) | .     | . | .     | ? |
| C25 | C25 | C26 | 66(2)    | 2_566 | . | .     | ? |
| C25 | C25 | C26 | 38(1)    | 2_566 | . | 2_566 | ? |
| C25 | C25 | C27 | 88(2)    | 2_566 | . | .     | ? |
| C25 | C25 | C28 | 143(3)   | 2_566 | . | .     | ? |
| C25 | C25 | C29 | 157(4)   | 2_566 | . | .     | ? |
| C26 | C25 | C26 | 105(2)   | .     | . | 2_566 | ? |
| C26 | C25 | C27 | 155(3)   | .     | . | .     | ? |
| C26 | C25 | C28 | 149(3)   | .     | . | .     | ? |



*Electronic Supporting Information*

|     |     |     |        |       |   |       |   |
|-----|-----|-----|--------|-------|---|-------|---|
| C26 | C25 | C29 | 90(3)  | .     | . | .     | ? |
| C26 | C25 | C27 | 49(2)  | 2_566 | . | .     | ? |
| C26 | C25 | C28 | 104(2) | 2_566 | . | .     | ? |
| C26 | C25 | C29 | 162(4) | 2_566 | . | .     | ? |
| C27 | C25 | C28 | 54(2)  | .     | . | .     | ? |
| C27 | C25 | C29 | 113(4) | .     | . | .     | ? |
| C28 | C25 | C29 | 58(3)  | .     | . | .     | ? |
| C25 | C26 | C25 | 74(2)  | .     | . | 2_566 | ? |
| C25 | C26 | C27 | 143(2) | .     | . | 2_566 | ? |
| C25 | C26 | C29 | 40(2)  | .     | . | .     | ? |
| C25 | C26 | C27 | 69(2)  | 2_566 | . | 2_566 | ? |
| C25 | C26 | C29 | 114(1) | 2_566 | . | .     | ? |
| C27 | C26 | C29 | 175(2) | 2_566 | . | .     | ? |
| C25 | C27 | C26 | 60(2)  | .     | . | 2_566 | ? |
| C25 | C27 | C28 | 46(2)  | .     | . | .     | ? |
| C26 | C27 | C28 | 106(3) | 2_566 | . | .     | ? |
| C25 | C28 | C27 | 79(3)  | .     | . | .     | ? |
| C25 | C28 | C29 | 46(2)  | .     | . | .     | ? |
| C27 | C28 | C29 | 125(3) | .     | . | .     | ? |
| C25 | C29 | C26 | 48(2)  | .     | . | .     | ? |
| C25 | C29 | C28 | 74(3)  | .     | . | .     | ? |
| C26 | C29 | C28 | 123(3) | .     | . | .     | ? |
